# Supplementary material for: Exposure to selenomethionine causes selenocysteine misincorporation and protein aggregation in Saccharomyces cerevisiae
Source: PubMed Central journal article supplement (PMC5355996; doi:10.1038/srep44761), 2017-03-17
Supplement: srep44761-s1.pdf [file srep44761-s1.pdf]

Supplementary Information for "Exposure to selenomethionine causes selenocysteine misincorporation and protein aggregation in *Saccharomyces cerevisiae*" by P. Plateau, C. Saveanu, R. Lestini, M. Dauplais, L. Decourty, A. Jacquier, S. Blanquet and M. Lazard

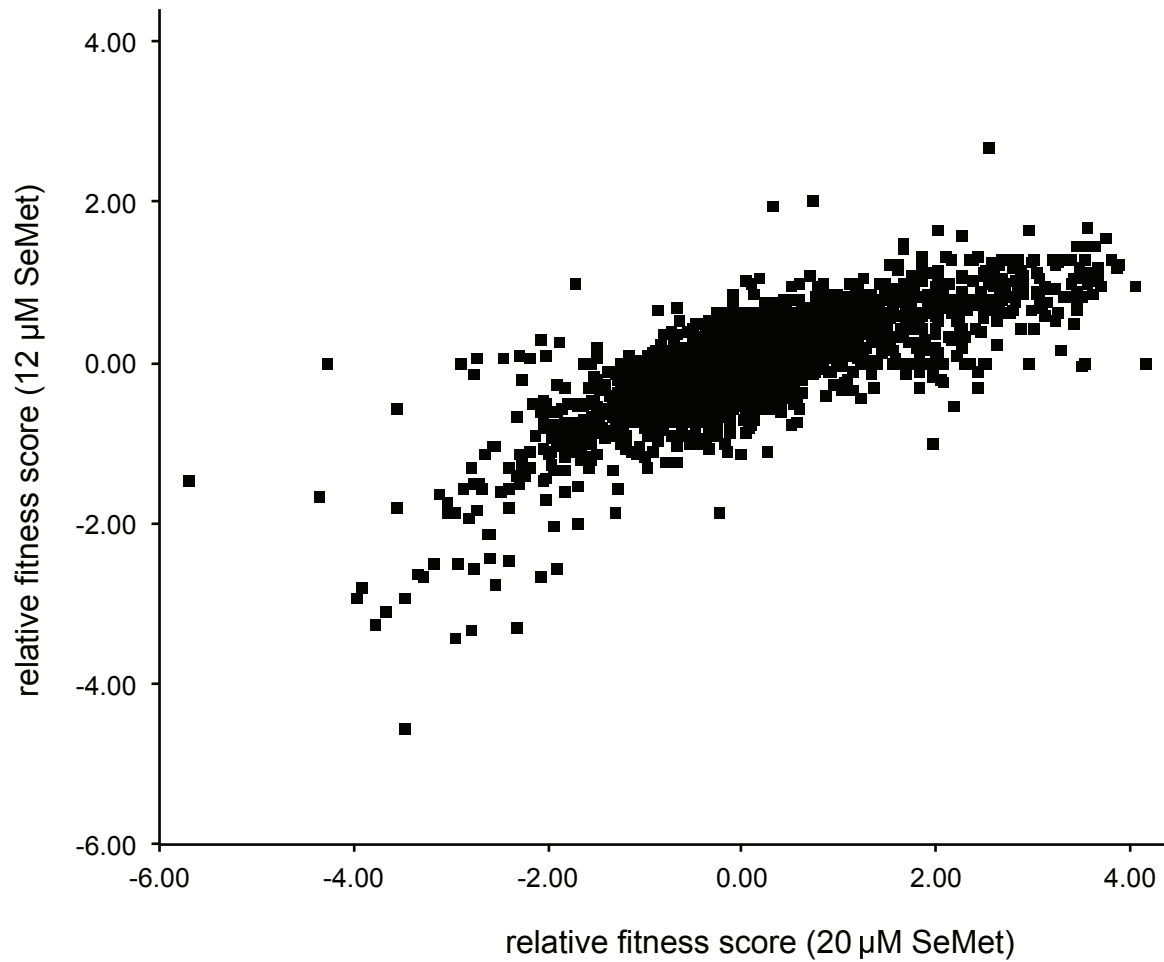

**Supplementary Figure 1.**

Relative fitness scores of the deletion strains grown in the presence of 12 μM SeMet (in ordinate) or 20 μM SeMet (in abscissa).

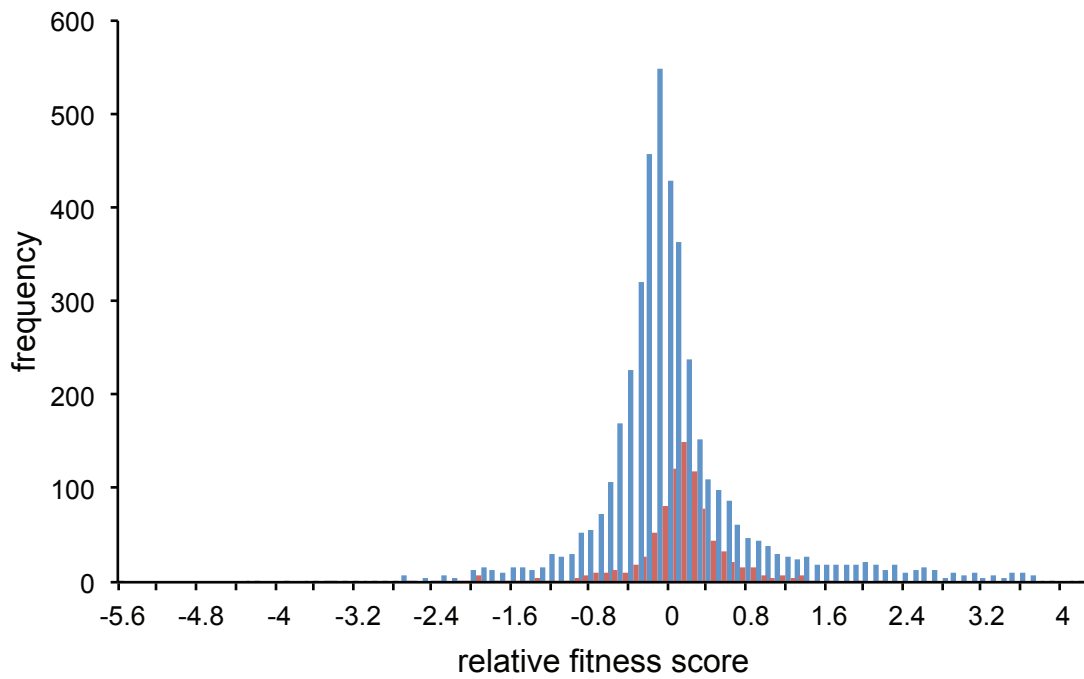

**Supplementary Figure 2.**

Distribution of the relative fitness scores among the deletion strains (in blue) and DAMP strains (in red) grown in the presence of 20  $\mu$ M SeMet. Size of bins = 0.1

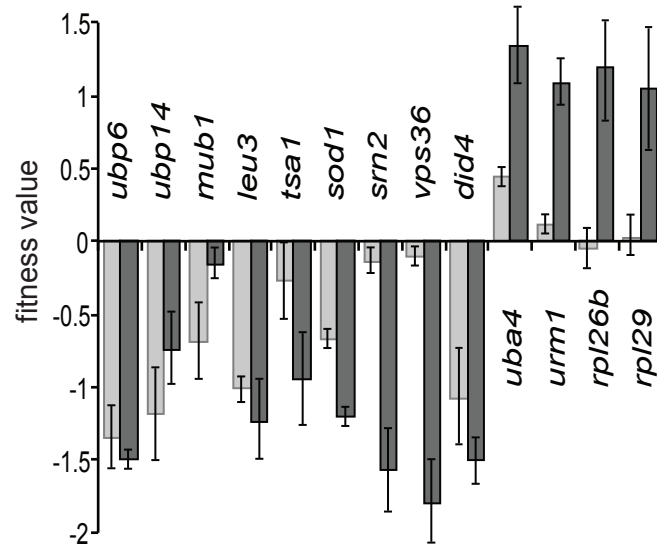

**Supplementary Figure 3.** Fitness value of selected mutants relative to the BY4742 parental strain.

Exponential growth rates of wild-type strain and indicated haploid mutants were measured in the absence or the presence of 20  $\mu\text{M}$  SeMet in SD + 100  $\mu\text{M}$  methionine (light grey boxes) or SC + 100  $\mu\text{M}$  methionine (dark grey boxes) medium. To compare with values obtained in the genomic screen (growth for 10 generations), fitness values were calculated according to the following equation  $10 \times (T_{w,t}^{\text{SeMet}} / T_{\text{mutant}}^{\text{SeMet}} - T_{w,t} / T_{\text{mutant}})$  where  $T$  is the generation time. The value indicated in the figure corresponds to the average and range of duplicate experiments. Generation times measured for the wild-type in SD + 100  $\mu\text{M}$  methionine medium were 116 and 178 min in the presence of 0 and 20  $\mu\text{M}$  SeMet, respectively. They were 98 and 158 min in SC + 100  $\mu\text{M}$  methionine medium.

A

1 MGKEKSHINV VVIGHVDSGK STTTGHLIYK CGGIDKRTIE KFEKEAAELG KGSFKYAWVL DKLKAERERG  
 71 ITIDIALWKF ETPKYQVTVI DAPGHRDFIK NMITGTSQAD CAILIAGGV GEFEAGISKD GQTRHALLA  
 141 FTLGVRQLIV AVNKMDSVKW DESRFQEIWK ETSNFIKKVG YNPKTVPFVP ISGWNGDNMI EATTNAPWYK  
 211 GWKETKAGV VKGKTLLEAI DAIEQPSRPT DKPLRLPLQD VYKIGGIGTV PVGRVETGVI KPGMVVTFAP  
 281 AGVTT**EVKSV** EMHHEOLEQG VPGDNVGFNV KNVSVKEIRR GNVCGDAKND PPKGCASFNA TVIVLNHPGQ  
 351 ISAGYSPVLD CHTAHIACRF DELLEKNDRR SGKKLEDHPK FLKSGDAALV K**FVPSKPMCV** EAFSEYPPLG  
 421 RFAVR**DMRQT** VAVGV**IKSVD** KTEKAAKGTK AAQKAAKHH HHHHGRIFYP YDVPDYAGLE VLFQGGPSPA  
 491 VDNKFNKEQQ NAFYEILHLP NLNEEQRNAF IQSLKDDPSQ SANLLAEAKK LNDAQAPKVD NKFNKEQQNA  
 561 FYEILHLPNL NEEQRNAFIQ SLKDDPSQSA NLLAEAKKLN DAQAPKVDAN HQ

B

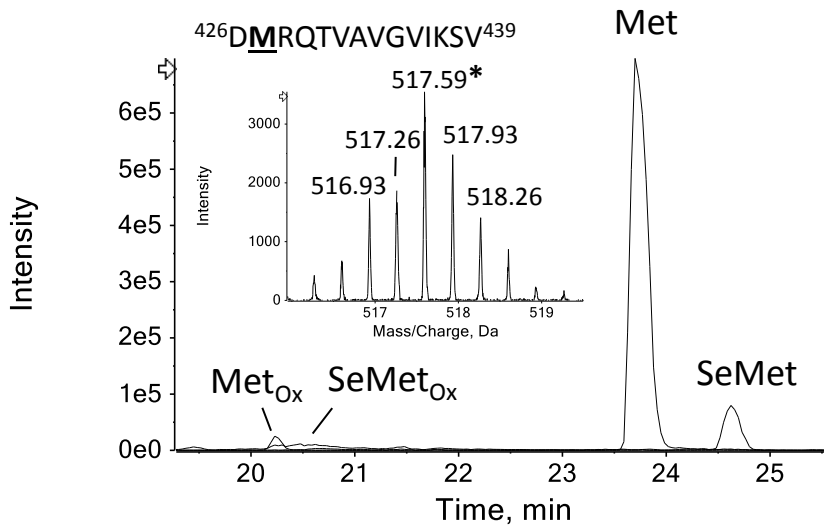

C

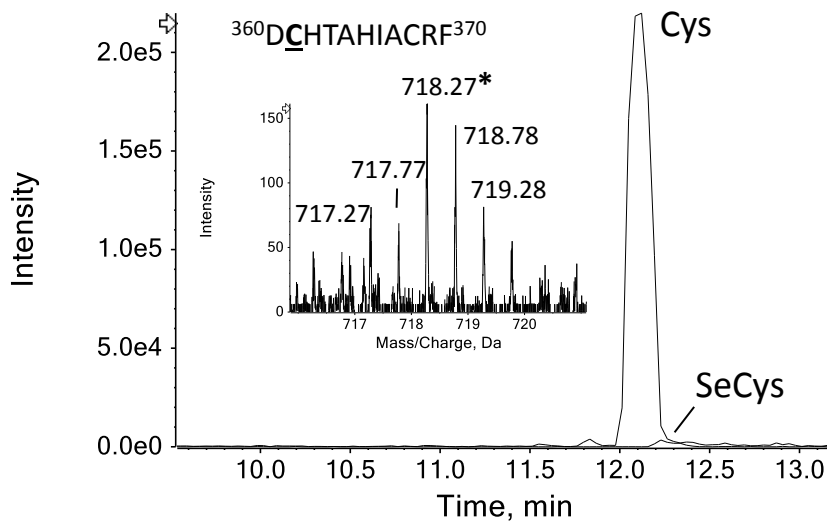

**Supplementary Figure 4.** ESI-MS analysis of purified EF1- $\alpha$

(A) Amino acid sequence of tagged EF1- $\alpha$ . Selenium-containing peptides identified by MS/MS analysis are shown in bold. Methioninyl and cysteinyl residues are boxed in grey. (B) MS extracted-ion chromatogram (XIC) of the 426-439 peptide and its selenized counterpart. Panel in insert shows the mass spectrum of the triply charged selenized peptide. Peak labeled with asterisk corresponds to the  $^{80}\text{Se}$  isotope peak. (C) MS extracted-ion chromatogram (XIC) of the 360-370 peptide and its selenized counterpart. Panel in insert shows the mass spectrum of the doubly charged selenized peptide. Peak labeled with asterisk corresponds to the  $^{80}\text{Se}$  isotope peak.

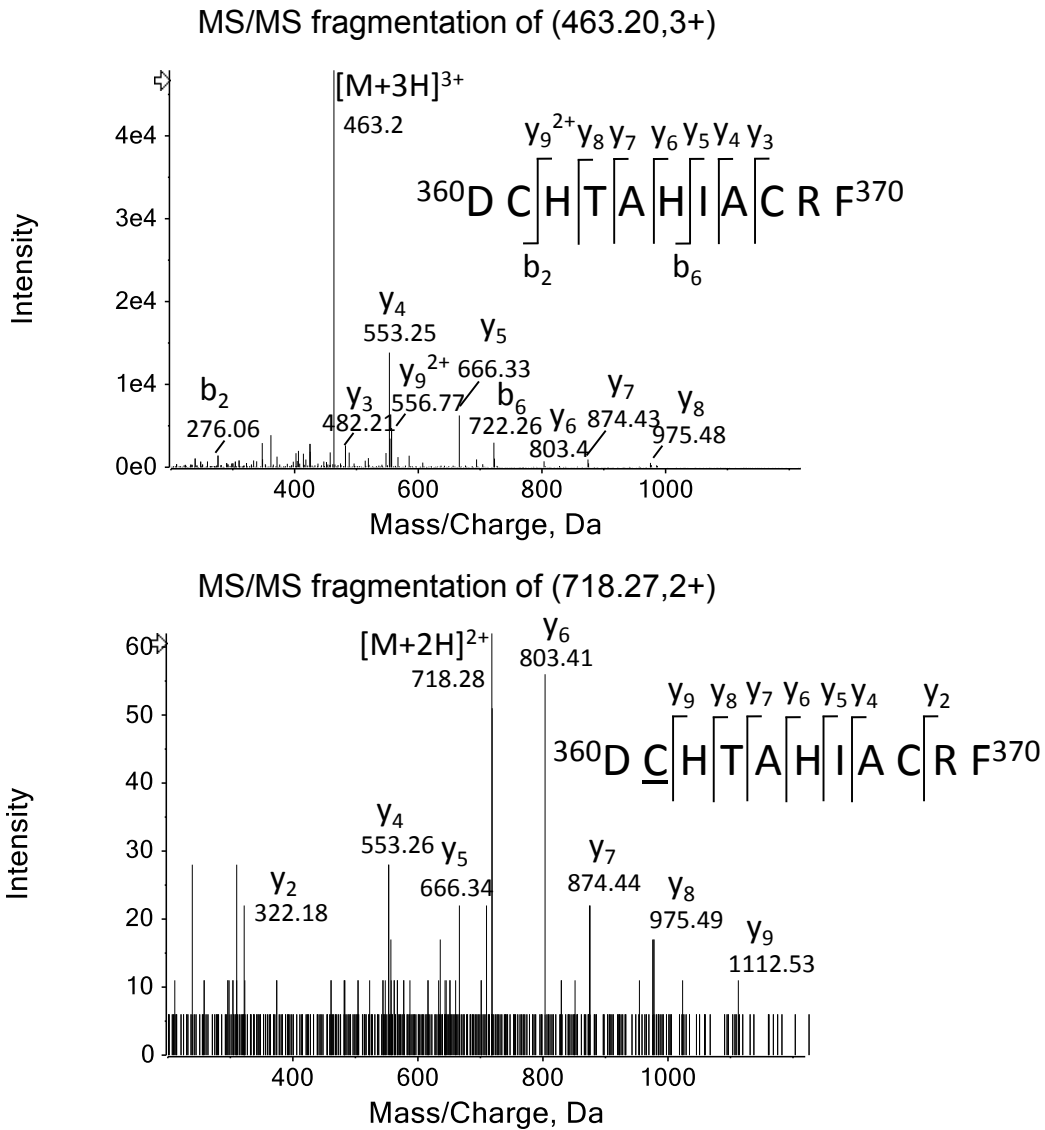

**Supplementary Figure 5.**

Comparison of the MS/MS fragmentation spectra of peptides 360-370 containing sulfur (upper panel) or selenium (lower panel). Identified fragments and their charge states are annotated on sequence. The difference in mass between the two precursor ions (47.94) indicates that the selenized 360-370 peptide contains only one selenium atom. Common fragments  $y_4$  to  $y_9$  in the two spectra indicate that this SeCys is located at position 361 (underlined on sequence).

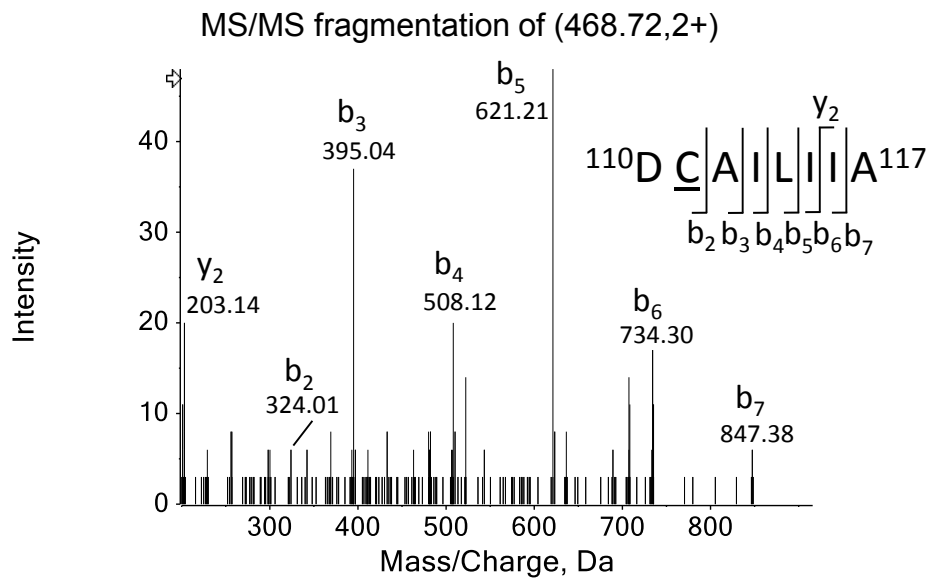

**Supplementary Figure 6.**

MS/MS fragmentation spectrum of peptide 110-117 containing selenium

**Supplementary Table S1 (provided as a separate file).** Global SeMet fitness profiling for all the 5241 strains with at least 2 independent results for the growth in the presence of 20  $\mu$ M SeMet.

### Supplementary Experimental Procedures

#### Purification and proteolytic digestion of EF1- $\alpha$

The BY4741 strain containing *TEF2* expressed from the BG1805 plasmid (Dharmacon) was grown at 30°C in 1 L of SC medium (without uracil) containing 100  $\mu$ M methionine to a  $OD_{650}$  of 0.8. Then, cells were harvested by centrifugation and resuspended in the same volume of medium containing 2% (w/v) galactose instead of glucose and 20  $\mu$ M SeMet. After 30 h incubation at 30°C, cells (2.2  $OD_{650}$ ) were harvested by centrifugation, washed, and resuspended in a 100 mM ammonium acetate buffer (pH 7.5) containing 200 mM NaCl, 10 mM imidazole, 5% glycerol (v/v), 2 mM 2-ME and protease inhibitors (1 mM phenylmethylsulfonyl fluoride, 0.5  $\mu$ g /mL aprotinin, 0.5  $\mu$ g /mL antipain, 0.5  $\mu$ g /mL chymostatin, 0.5  $\mu$ g /mL leupeptin, 0.5  $\mu$ g /mL pepstatin A, 100  $\mu$ g /mL benzamidine, 1  $\mu$ g /mL *o*-phenantroline and 6  $\mu$ g /mL ovomucoid). Cells were lysed by vortexing at 4°C for 10  $\times$  30 sec in the presence of an equal volume of glass beads. After centrifugation at 10000  $\times$  g for 10 min, the supernatant was adjusted to 5 ml, mixed with 1 ml of TALON resin (Clontech) and incubated for 1 h at 4°C. After washing with 15 volumes of 100 mM ammonium acetate (pH 7.5), 10 mM imidazole and 2 mM 2-ME, elution was performed in the same buffer containing 125 mM imidazole. Thiols and selenols were reduced with 20 mM dithiothreitol for 30 min followed by alkylation with 50 mM iodoacetamide for 1 h. After concentration to 1 mg/mL, the sample was extensively dialyzed against 100 mM ammonium acetate (pH 7.5). Proteolytic digestion was performed overnight at 37°C after addition of 200 ng of Asp-N (Promega, Madison, WI, USA) to 5  $\mu$ g protein sample diluted in 25 mM  $NH_4HCO_3$ . Finally, 0.5  $\mu$ g Asp-N-generated peptides were diluted in 0.1 % (v/v) trifluoroacetic acid and 5% (v/v) acetonitrile and analyzed by LC-MS/MS.
